# Supplementary material for: Immunomodulatory effects of stem cell-derived extracellular vesicles on NLRP3 inflammasome activation in the brain after chronic ethanol exposure
Source: Research Square preprint supplement (doi:10.21203/rs.3.rs-7957853/v1), 2025-11-13
Supplement: Supplementary file 1 [file 741f9e1fea19e416b62e3eb3.docx]

**Table 1.** Nucleotide sequences of the primers used for the RT-PCR of genes.

| Gene | Primer sequences (5’ to 3’) |
| --- | --- |
| *Nlrp3* | F: AAGTCCTGCCCCAAGCCCCA  R: GGAAGGGCAGCCTCTGGCAG |
| *Casp-1* | F: GGCACATTTCCAGGACTGACTG  R: GCAAGACGAGTACGAGTGGTTG |
| *Il1b* | F: GACCCCAAAAGATGAAGGGCT  R: TGTGCTGCTGCGAGATTTGA |
| *Il18* | F: ACTGTACAACCGCAGTAATACGG  R: AGTGAACATTACAGATTTATCCC |
| *Nlrp1* | F: TCCAAGAGAGGGTCCACTGA  R: CCTTGCTGAAACCAGGAGAC |
| *Aim2* | F: GTCACCAGTTCCTCAGTTGTG  R: TGTCTCCTTCCTCGCACTTT |
| *Nlrc4* | F: TGATGCTGCCTTGGTGCT  R: ATCCGTCACTGCTCACACAG |
| *Casp-11/4* | F: CCGAGACAAAACAGGAGGC  R: GGTGGGCATCTGGGAATGA |
| *Irak1* | F: GGACTTCCACAGTTCGAGGTAC  R: GGTCTTTGCACCTTGTGTCCTC |
| *Tlr4* | F: TGCCTCTCTTGCATCTGGCTGG  R: CTGTCAGTACCAAGGTTGAGAGCTGG |
| *Cyclophilin A* | F: GTCTCCTTCGAGCTGTTTGC  R: GATGCCAGGACCTGTATGCT |
|  |  |
